# Supplementary material for: The effect of testosterone on the gut microbiome in mice
Source: PubMed Central journal article supplement (PMC11271554; doi:10.1038/s42003-024-06470-5), 2024-07-19
Supplement: 42003_2024_6470_MOESM2_ESM.pdf [file 42003_2024_6470_MOESM2_ESM.pdf]

## **Description of Additional Supplementary Files**

File name: Supplementary Data 1

Description: The source data behind Figure 1 in the paper

File name: Supplementary Data 2

Description: The source data behind Figure 2 in the paper

File name: Supplementary Data 3

Description: The source data behind Figure 3 in the paper

File name: Supplementary Data 4

Description: The source data behind Figure 4 in the paper

File name: Supplementary Data 5

Description: The source data behind Figure 5 in the paper

File name: Supplementary Data 6

Description: The source data behind Figure 6 in the paper

File name: Supplementary Data 7

Description: The source data behind the Supplementary figures
